# Supplementary material
Source: PubMed Central journal article supplement (PMC7606626)
Supplement: NIHMS1633245-supplement-216_2020_2961_MOESM1_ESM.pdf [file NIHMS1633245-supplement-216_2020_2961_MOESM1_ESM.pdf]

**Analytical and Bioanalytical Chemistry**

**Electronic Supplementary Material**

**Lipidomic profiling of single mammalian cells by infrared matrix-assisted laser desorption electrospray ionization (IR-MALDESI)**

Ying Xi, Anqi Tu, David C. Muddiman

Additional file available under [10.1007/s00216-020-02961-6](https://doi.org/10.1007/s00216-020-02961-6)
